# Supplementary material for: Integrative single-cell omics analyses reveal epigenetic heterogeneity in mouse embryonic stem cells
Source: PLoS Comput Biol. 2018 Mar 21;14(3):e1006034. doi: 10.1371/journal.pcbi.1006034 (PMC5862410; doi:10.1371/journal.pcbi.1006034)
Supplement: S4 Table — (XLSX) [file pcbi.1006034.s009.xlsx]

## Sheet: Module1
Homer de novo Motif Results
Rank	Motif	P-value	log P-pvalue	% of Targets	% of Background	STD(Bg STD)	Best Match/Details
1 *		0.001	-8.56	0.3047	0.2442	273.8bp (281.4bp)	Smad3(MAD)/NPC-Smad3-ChIP-Seq(GSE36673)/Homer(0.606)
2 *		0.01	-6.697	0.2179	0.172	309.4bp (292.6bp)	POL008.1_DCE_S_I/Jaspar(0.701)
3 *		0.01	-5.672	0.1041	0.0749	235.4bp (234.4bp)	PB0098.1_Zfp410_1/Jaspar(0.605)
4 *		0.01	-5.605	0.0366	0.0199	216.7bp (203.8bp)	POL010.1_DCE_S_III/Jaspar(0.670)
5 *		0.01	-5.596	0.2449	0.2025	242.6bp (239.4bp)	MA0597.1_THAP1/Jaspar(0.672)
6 *		0.01	-5.512	0.2816	0.2373	284.9bp (283.5bp)	SD0001.1_at_AC_acceptor/Jaspar(0.707)
7 *		0.01	-4.666	0.0338	0.0194	247.8bp (244.2bp)	GLI3(Zf)/Limb-GLI3-ChIP-Chip(GSE11077)/Homer(0.667)

## Sheet: Module2
Homer de novo Motif Results
Rank	Motif	P-value	log P-pvalue	% of Targets	% of Background	STD(Bg STD)	Best Match/Details
1 *		1e-05	-12.61	0.3898	0.2845	257.7bp (252.0bp)	Atf4(bZIP)/MEF-Atf4-ChIP-Seq(GSE35681)/Homer(0.799)
2 *		1e-05	-12.32	0.4213	0.3152	272.2bp (260.8bp)	PB0029.1_Hic1_1/Jaspar(0.773)
3 *		0.0001	-10.76	0.0925	0.0434	190.7bp (219.9bp)	PB0112.1_E2F2_2/Jaspar(0.741)
4 *		0.0001	-9.881	0.1476	0.087	203.7bp (226.4bp)	PB0114.1_Egr1_2/Jaspar(0.714)
5 *		0.0001	-9.589	0.2441	0.1683	251.7bp (262.5bp)	MA0161.1_NFIC/Jaspar(0.803)
6 *		0.001	-9.153	0.1988	0.1312	255.4bp (279.9bp)	PB0110.1_Bcl6b_2/Jaspar(0.699)
7 *		0.001	-8.537	0.2303	0.1608	239.9bp (233.2bp)	MYB(HTH)/ERMYB-Myb-ChIPSeq(GSE22095)/Homer(0.747)
8 *		0.001	-7.283	0.0827	0.0448	251.2bp (282.6bp)	MA0461.1_Atoh1/Jaspar(0.751)
9 *		0.01	-6.287	0.0807	0.046	302.2bp (291.5bp)	PB0120.1_Foxj1_2/Jaspar(0.697)
10 *		0.01	-5.289	0.0315	0.0131	239.5bp (243.9bp)	MyoG(bHLH)/C2C12-MyoG-ChIP-Seq(GSE36024)/Homer(0.714)
11 *		0.01	-4.983	0.1614	0.119	240.7bp (245.1bp)	Tcf12(bHLH)/GM12878-Tcf12-ChIP-Seq(GSE32465)/Homer(0.727)

## Sheet: Module3
Homer de novo Motif Results
Rank	Motif	P-value	log P-pvalue	% of Targets	% of Background	STD(Bg STD)	Best Match/Details
1 *		1e-08	-18.72	0.2427	0.0605	182.3bp (247.4bp)	MA0006.1_Arnt::Ahr/Jaspar(0.733)
2 *		1e-05	-13.23	0.3398	0.1475	181.7bp (309.4bp)	Ets1-distal(ETS)/CD4+-PolII-ChIP-Seq(Barski et al.)/Homer(0.868)
3 *		1e-05	-11.56	0.0777	0.0083	144.2bp (153.0bp)	POL009.1_DCE_S_II/Jaspar(0.685)
4 *		0.0001	-11.2	0.4951	0.2889	193.9bp (243.4bp)	Tcf12(bHLH)/GM12878-Tcf12-ChIP-Seq(GSE32465)/Homer(0.687)
5 *		0.0001	-10.99	0.1456	0.0377	205.7bp (308.7bp)	PB0167.1_Sox13_2/Jaspar(0.702)
6 *		0.001	-9.152	0.2039	0.0807	193.7bp (294.2bp)	MA0124.1_NKX3-1/Jaspar(0.663)
7 *		0.001	-8.825	0.0583	0.0064	116.2bp (170.6bp)	PB0124.1_Gabpa_2/Jaspar(0.605)
8 *		0.01	-6.391	0.3883	0.2493	169.8bp (267.7bp)	PB0100.1_Zfp740_1/Jaspar(0.836)

## Sheet: Module4
Homer de novo Motif Results
Rank	Motif	P-value	log P-pvalue	% of Targets	% of Background	STD(Bg STD)	Best Match/Details
1 *		1e-07	-17.85	0.3434	0.1194	222.4bp (300.5bp)	Lhx2(Homeobox)/HFSC-Lhx2-ChIP-Seq(GSE48068)/Homer(0.944)
2 *		1e-07	-17.22	0.3737	0.1428	240.4bp (308.8bp)	POL008.1_DCE_S_I/Jaspar(0.750)
3 *		0.0001	-9.5	0.2929	0.1375	250.8bp (287.6bp)	PB0130.1_Gm397_2/Jaspar(0.705)
4 *		0.001	-8.786	0.1717	0.0604	197.0bp (319.9bp)	PH0037.1_Hdx/Jaspar(0.751)
5 *		0.001	-8.248	0.1313	0.0396	160.4bp (217.0bp)	MA0524.1_TFAP2C/Jaspar(0.622)
6 *		0.01	-6.156	0.3434	0.2109	244.7bp (359.4bp)	PB0069.1_Sox21_1/Jaspar(0.821)
7 *		0.01	-5.025	0.1212	0.0515	281.1bp (337.4bp)	RUNX2(Runt)/PCa-RUNX2-ChIP-Seq(GSE33889)/Homer(0.668)

## Sheet: Module5
Homer de novo Motif Results
Rank	Motif	P-value	log P-pvalue	% of Targets	% of Background	STD(Bg STD)	Best Match/Details
1 *		1e-06	-15.15	0.3457	0.1206	169.4bp (272.7bp)	PB0137.1_Irf3_2/Jaspar(0.640)
2 *		1e-06	-14.78	0.3086	0.1	230.9bp (230.4bp)	Smad4(MAD)/ESC-SMAD4-ChIP-Seq(GSE29422)/Homer(0.578)
3 *		1e-05	-12.24	0.1235	0.0176	249.6bp (277.7bp)	MA0028.1_ELK1/Jaspar(0.792)
4 *		0.0001	-11.08	0.0988	0.0117	189.5bp (328.2bp)	MA0093.2_USF1/Jaspar(0.722)
5 *		0.0001	-11.03	0.3333	0.1412	268.4bp (308.0bp)	Pitx1(Homeobox)/Chicken-Pitx1-ChIP-Seq(GSE38910)/Homer(0.768)
6 *		0.0001	-10.8	0.1358	0.0268	141.4bp (300.9bp)	MA0592.1_ESRRA/Jaspar(0.670)
7 *		0.0001	-9.93	0.2963	0.1243	227.6bp (260.6bp)	Smad2(MAD)/ES-SMAD2-ChIP-Seq(GSE29422)/Homer(0.738)
8 *		0.001	-8.461	0.0494	0.0027	99.3bp (110.3bp)	ETS:RUNX(ETS,Runt)/Jurkat-RUNX1-ChIP-Seq(GSE17954)/Homer(0.626)
9 *		0.001	-7.306	0.1111	0.0282	108.7bp (213.5bp)	MA0042.1_FOXI1/Jaspar(0.675)
10 *		0.001	-7.023	0.4815	0.306	232.9bp (241.9bp)	PB0110.1_Bcl6b_2/Jaspar(0.678)
11 *		0.01	-6.4	0.037	0.0021	199.1bp (162.6bp)	Sox4(HMG)/proB-Sox4-ChIP-Seq(GSE50066)/Homer(0.665)
12 *		0.01	-6.348	0.3333	0.1884	217.2bp (261.9bp)	MA0111.1_Spz1/Jaspar(0.673)
